# Supplementary material
Source: Preprints.org preprint supplement (doi:10.20944/preprints201905.0146.v1)
Supplement: Supplementary file 2 [file supplementary]

## Sheet: Acc. Age Group 10-20
FB					FB					FB					FB				The values below are the amount of epochs in which stimulus frequency was detected correctly
10 epochs					7 epochs					5 epochs					4 epochs
	oz(1st)	6				oz(1st)	6				oz(1st)	6				oz(1st)	6
4 hz	6	8			4 hz	2	5			4 hz	2	3			4 hz	1	3
6.6 hz	8	8			6.6 hz	6	6			6.6 hz	4	5			6.6 hz	4	4
7.5 hz					7.5 hz					7.5 hz					7.5 hz
8.57 hz	0	0			8.57 hz	0	0			8.57 hz	0	0			8.57 hz	0	0
10 hz	9	3			10 hz	6	1			10 hz	5	2			10 hz	3	0
12 hz	10	8			12 hz	7	5			12 hz	5	3			12 hz	4	4
15 hz	8	0			15 hz	6	0			15 hz	4	0			15 hz	3	0
20 hz	4	0			20 hz	3	0			20 hz	2	0			20 hz	3	0
25 hz	0	0			25 hz	0	0			25 hz	0	0			25 hz	0	0
30 hz	9	10			30 hz	6	7			30 hz	4	5			30 hz	3	4
VGB					VGB					VGB					VGB
10 epochs					7 epochs					5 epochs					4 epochs
	oz(1st)	6				oz(1st)	6				oz(1st)	6				oz(1st)	6
4 hz	10	10			4 hz	4	7			4 hz	5	5			4 hz	2	4
6.6 hz	9	9			6.6 hz	6	4			6.6 hz	5	5			6.6 hz	4	4
7.5 hz	10	10			7.5 hz	0	7			7.5 hz	0	5			7.5 hz	4	4
8.57 hz					8.57 hz					8.57 hz					8.57 hz
10 hz	7	0			10 hz	1	0			10 hz	2	1			10 hz	2	3
8.57 hz					8.57 hz					8.57 hz					8.57 hz
15 hz	0	0			15 hz	0	0			15 hz	0	0			15 hz	0	0
20 hz	0	0			20 hz	0	0			20 hz	0	0			20 hz	0	0
25 hz	0	0			25 hz	0	0			25 hz	2	0			25 hz	0	0
30 hz	0	0			30 hz	3	0			30 hz	0	1			30 hz	0	0
CG					CG					CG					CG
10 epochs					7 epochs					5 epochs					4 epochs
	oz(1st)	6				oz(1st)	6				oz(1st)	6				oz(1st)	6
4 hz	10	10			4 hz	7	7			4 hz	4	5			4 hz	4	4
6.6 hz	10	7			6.6 hz	7	5			6.6 hz	5	4			6.6 hz	4	4
7.5 hz	9	10			7.5 hz	6	7			7.5 hz	5	5			7.5 hz	4	3
8.57 hz	2	0			8.57 hz	2	1			8.57 hz	2	1			8.57 hz	3	1
10 hz	7	3			10 hz	6	0			10 hz	5	0			10 hz	3	0
12 hz	3	0			12 hz	7	0			12 hz	2	0			12 hz	4	1
15 hz	1	0			15 hz	2	0			15 hz	2	0			15 hz	1	0
20 hz	2	0			20 hz	1	0			20 hz	2	0			20 hz	2	0
25 hz	0	0			25 hz	0	0			25 hz	0	0			25 hz	0	0
30 hz	10	8			30 hz	7	5			30 hz	5	5			30 hz	4	4
SS					SS					SS					SS
10 epochs					7 epochs					5 epochs					4 epochs
	oz(1st)	6				oz(1st)	6				oz(1st)	6				oz(1st)	6
4 hz	7	10			4 hz	5	7			4 hz	4	5			4 hz	2	4
6.6 hz	9	5			6.6 hz	6	7			6.6 hz	4	4			6.6 hz	2	4
7.5 hz	7	8			7.5 hz	4	5			7.5 hz	4	5			7.5 hz	4	4
8.57 hz	3	0			8.57 hz	2	0			8.57 hz	1	0			8.57 hz	1	0
10 hz	7	2			10 hz	3	1			10 hz	2	1			10 hz	1	1
12 hz	9	1			12 hz	7	3			12 hz	4	2			12 hz	4	2
15 hz	7	0			15 hz	5	1			15 hz	5	0			15 hz	4	0
20 hz	4	0			20 hz	3	0			20 hz	2	0			20 hz	3	0
25 hz	1	0			25 hz	0	0			25 hz	0	0			25 hz	0	0
30 hz	10	7			30 hz	7	5			30 hz	5	3			30 hz	4	4

## Sheet: Acc. Age Group 20-40
10 epoch									7 epoch									5 epoch									4 epoch
	oz(1st)	6								oz(1st)	6								oz(1st)	6								oz(1st)	6
4 hz	10	10							4 hz	6	7							4 hz	5	5							4 hz	4	4
6.6 hz	10	9							6.6 hz	7	6							6.6 hz	5	5							6.6 hz	4	3
7.5 hz	10	9							7.5 hz	7	6							7.5 hz	5	5							7.5 hz	4	3
8.57 hz	10	3							8.57 hz	7	3							8.57 hz	5	0							8.57 hz	4	0
10 hz	10	4							10 hz	6	0							10 hz	5	2							10 hz	4	3
12 hz	10	7							12 hz	7	4							12 hz	5	3							12 hz	4	3
15 hz	8	0							15 hz	6	1							15 hz	4	0							15 hz	3	0
20 hz	6	0							20 hz	6	0							20 hz	5	0							20 hz	3	0
25 hz	0	0							25 hz	0	0							25 hz	0	0							25 hz	0	0
30 hz	10	10							30 hz	7	7							30 hz	5	5							30 hz	4	4
JV result									JV result									JV result									JV result
10 epoch									7 epoch									5 epoch									4 epoch
	oz(1st)	6								oz(1st)	6								oz(1st)	6								oz(1st)	6
4 hz	8	8							4 hz	6	7							4 hz	5	5							4 hz	3	4
6.6 hz									6.6 hz									6.6 hz									6.6 hz
7.5 hz	9	9							7.5 hz	7	7							7.5 hz	5	5							7.5 hz	4	4
8.57 hz	8	7							8.57 hz	6	5							8.57 hz	4	3							8.57 hz	3	3
10 hz	9	9							10 hz	6	7							10 hz	4	4							10 hz	3	3
12 hz	9	3							12 hz	7	4							12 hz	5	3							12 hz	4	1
15 hz	8	1							15 hz	5	0							15 hz	5	0							15 hz	4	1
20 hz	1	0							20 hz	2	0							20 hz	4	0							20 hz	1	0
25 hz	0	0							25 hz	0	0							25 hz	0	0							25 hz	0	0
30 hz	8	9							30 hz	6	7							30 hz	5	5							30 hz	4	4
AE result									AE result									AE result									AE result
10 epoch									7 epoch									5 epoch									4 epoch
	oz(1st)	6								oz(1st)	6								oz(1st)	6								oz(1st)	6
4 hz	6	9							4 hz	7	5							4 hz	4	4							4 hz	4	4
6.6 hz	9	9							6.6 hz	7	7							6.6 hz	5	5							6.6 hz	4	4
7.5 hz	9	10							7.5 hz	7	7							7.5 hz	5	5							7.5 hz	4	4
8.57 hz	10	8							8.57 hz	7	6							8.57 hz	5	5							8.57 hz	4	4
10 hz	9	9							10 hz	7	7							10 hz	5	5							10 hz	4	4
12 hz	9	3							12 hz	7	3							12 hz	5	2							12 hz	4	1
15 hz	6	0							15 hz	5	0							15 hz	3	0							15 hz	3	0
20 hz	1	0							20 hz	1	0							20 hz	0	0							20 hz	1	0
25 hz	0	0							25 hz	0	1							25 hz	0	1							25 hz	0	0
30 hz	6	3							30 hz	4	5							30 hz	2	4							30 hz	2	3
DV result									DV result									DV result									DV result
10 epochs									7 epochs									5 epochs									4 epochs
	oz (1)	6								oz (1)	6								oz (1)	6								oz (1)	6
4 Hz	4	9							4 Hz	5	7							4 Hz	4	5							4 Hz	3	4
6Hz	10	7							6Hz	7	5							6Hz	5	3							6Hz	4	4
7.5 Hz	9	10							7.5 Hz	7	7							7.5 Hz	5	5							7.5 Hz	4	4
8.57 Hz	9	3							8.57 Hz	7	1							8.57 Hz	5	1							8.57 Hz	4	0
10 Hz	9	6							10 Hz	7	4							10 Hz	4	2							10 Hz	4	2
12 Hz	9	5							12 Hz	7	3							12 Hz	5	1							12 Hz	4	0
15 Hz	9	3							15 Hz	6	3							15 Hz	5	1							15 Hz	4	1
20 Hz	4	1							20 Hz	3	1							20 Hz	3	0							20 Hz	2	0
25Hz	0	0							25Hz	0	0							25Hz	0	0							25Hz	0	0
30Hz	10	8							30Hz	7	6							30Hz	5	4							30Hz	4	4

## Sheet: Acc. Age Group 40-60
QS							QS							QS							QS
10 epochs							7 epochs							5 epochs							4 epochs
	oz(1st)	6						oz(1st)	6						oz(1st)	6						oz(1st)	6
4 hz	5	7					4 hz	6	6					4 hz	4	5					4 hz	3	4
6.6 hz	6	8					6.6 hz	3	5					6.6 hz	4	5					6.6 hz	2	3
7.5 hz	8	9					7.5 hz	7	7					7.5 hz	5	5					7.5 hz	4	4
8.57 hz	3	2					8.57 hz	3	1					8.57 hz	1	0					8.57 hz	0	1
10 hz	10	5					10 hz	6	3					10 hz	5	3					10 hz	3	2
12 hz							12 hz							12 hz							12 hz
15 hz	0	0					15 hz	0	0					15 hz	0	0					15 hz	0	0
20 hz	0	0					20 hz	0	0					20 hz	0	0					20 hz	0	0
25 hz	1	0					25 hz	0	0					25 hz	0	1					25 hz	0	0
30 hz	10	10					30 hz	7	7					30 hz	5	5					30 hz	4	4
ES							ES							ES							ES
10 epochs							7 epochs							5 epochs							4 epochs
	oz(1st)	6						oz(1st)	6						oz(1st)	6						oz(1st)	6
4 hz	4	8					4 hz	2	6					4 hz	1	5					4 hz	1	4
6.6 hz	9	8					6.6 hz	7	6					6.6 hz	5	5					6.6 hz	4	2
7.5 hz	10	9					7.5 hz	7	6					7.5 hz	5	5					7.5 hz	4	4
8.57 hz	8	1					8.57 hz	6	1					8.57 hz	4	1					8.57 hz	3	1
10 hz	9	6					10 hz	7	4					10 hz	5	3					10 hz	4	3
12 hz	9	8					12 hz	7	5					12 hz	5	4					12 hz	4	3
15 hz	7	2					15 hz	5	3					15 hz	4	1					15 hz	3	0
20 hz	2	4					20 hz	0	1					20 hz	2	2					20 hz	0	0
25 hz	0	0					25 hz	0	0					25 hz	1	0					25 hz	0	0
30 hz	4	5					30 hz	3	4					30 hz	4	3					30 hz	2	3
CA							CA									CA					CA
10 epochs							7 epochs									5 epochs					4 epochs
	Oz	6						Oz	6								Oz	6				Oz	6
4 hz							4 hz									4 hz					4 hz
6.6 hz	9	9					6.6 hz	7	6							6.6 hz	5	5			6.6 hz	4	4
7.5 hz	8	10					7.5 hz	6	7							7.5 hz	5	5			7.5 hz	4	3
8.57 hz	10	9					8.57 hz	7	6							8.57 hz	5	5			8.57 hz	4	4
10 hz	7	3					10 hz	7	3							10 hz	4	2			10 hz	4	2
12 hz	7	2					12 hz	4	2							12 hz	4	1			12 hz	3	2
15 hz	3	2					15 hz	4	0							15 hz	5	2			15 hz	4	1
20 hz	3	0					20 hz	1	1							20 hz	1	0			20 hz	2	1
25 hz	1	2					25 hz	1	0							25 hz	0	0			25 hz	0	0
30 hz	10	10					30 hz	7	7							30 hz	5	5			30 hz	4	4
AR							AR									AR									AR
10 epochs							7 epochs									5 epochs									4 epochs
	Oz	6						Oz	6								Oz	6								Oz	6
4 hz	7	8					4 hz	2	4							4 hz	2	4							4 hz	3	1
6.6 hz	8	10					6.6 hz	6	6							6.6 hz	4	5							6.6 hz	2	4
7.5 hz	10	9					7.5 hz	7	6							7.5 hz	5	5							7.5 hz	4	4
8.57 hz	10	4					8.57 hz	7	4							8.57 hz	5	2							8.57 hz	4	2
10 hz	10	5					10 hz	7	4							10 hz	4	3							10 hz	3	2
12 hz	9	3					12 hz	7	1							12 hz	5	1							12 hz	4	1
15 hz	9	1					15 hz	6	1							15 hz	5	2							15 hz	4	1
20 hz	8	0					20 hz	6	0							20 hz	5	0							20 hz	3	1
25 hz							25 hz									25 hz									25 hz
30 hz	10	10					30 hz	7	7							30 hz	5	5							30 hz	4	4

## Sheet: Acc. Age Group >60
VA					VA					VA				VA
10 epochs					7 epochs					5 epochs				4 epochs
						oz(1st)	6				oz(1st)	6			oz(1st)	6
	oz(1st)	6			4 hz	6	7			4 hz	5	4		4 hz	3	4
4 hz	7	9			6.6 hz	5	5			6.6 hz	5	5		6.6 hz	2	3
6.6 hz	6	8			7.5 hz	5	5			7.5 hz	4	3		7.5 hz	0	1
7.5 hz	6	5			8.57 hz	4	0			8.57 hz	4	1		8.57 hz	3	0
8.57 hz	5	0			10 hz	3	1			10 hz	3	2		10 hz	2	0
10 hz	4	3			12 hz	2	0			12 hz	1	1		12 hz	1	1
12 hz	3	0			15 hz	1	0			15 hz	0	0		15 hz	1	0
15 hz	1	0			20 hz	0	0			20 hz	0	0		20 hz	0	0
20 hz	0	0			25 hz	0	0			25 hz	0	1		25 hz	0	0
25 hz	0	1			30 hz	7	5			30 hz	5	4		30 hz	4	3
30 hz	10	3
CS					CS					CS				CS
10 epochs					7 epochs					5 epochs				4 epochs
	oz(1st)	6				oz(1st)	6				oz(1st)	6			oz(1st)	6
4 hz	9	9			4 hz	6	7			4 hz	3	5		4 hz	3	4
6.6 hz	7	9			6.6 hz	5	7			6.6 hz	3	4		6.6 hz	4	4
7.5 hz	10	7			7.5 hz	7	6			7.5 hz	5	3		7.5 hz	4	1
8.57 hz	5	2			8.57 hz	2	1			8.57 hz	4	0		8.57 hz	2	1
10 hz	6	5			10 hz	4	2			10 hz	3	2		10 hz	3	1
12 hz	2	0			12 hz	4	0			12 hz	1	0		12 hz	2	0
15 hz	0	0			15 hz	0	0			15 hz	0	0		15 hz	0	0
20 hz	0	0			20 hz	1	0			20 hz	1	0		20 hz	0	0
25 hz	0	0			25 hz	0	0			25 hz	0	0		25 hz	0	0
30 hz	1	0			30 hz	7	0			30 hz	5	0		30 hz	4	1
EM					EM					EM				EM
10 epochs					7 epochs					5 epochs				4 epochs
	oz(1st)	6				oz(1st)	6				oz(1st)	6			oz(1st)	6
4 hz	7	10			4 hz	5	7			4 hz	4	4		4 hz	3	3
6.6 hz	6	7			6.6 hz	4	7			6.6 hz	2	5		6.6 hz	2	4
7.5 hz	7	4			7.5 hz	6	6			7.5 hz	4	5		7.5 hz	3	2
8.57 hz	4	3			8.57 hz	3	1			8.57 hz	3	0		8.57 hz	2	0
10 hz	5	2			10 hz	3	2			10 hz	4	2		10 hz	2	0
12 hz	6	1			12 hz	6	1			12 hz	4	0		12 hz	3	0
15 hz	2	0			15 hz	1	0			15 hz	1	0		15 hz	1	0
20 hz	4	0			20 hz	3	0			20 hz	4	0		20 hz	2	0
25 hz					25 hz					25 hz				25 hz
30 hz	10	10			30 hz	7	7			30 hz	5	5		30 hz	4	4
RS					RS					RS				RS
10 epochs					7 epochs					5 epochs				4 epochs
	oz(1st)	6				oz(1st)	6				oz(1st)	6			oz(1st)	6
4 hz	8	10			4 hz	7	7			4 hz	5	5		4 hz	4	3
6.6 hz	4	2			6.6 hz	3	3			6.6 hz	2	2		6.6 hz	3	2
7.5 hz	7	7			7.5 hz	4	4			7.5 hz	5	2		7.5 hz	4	2
8.57 hz	4	0			8.57 hz	3	0			8.57 hz	2	0		8.57 hz	2	1
10 hz	7	5			10 hz	6	2			10 hz	3	2		10 hz	1	1
12 hz	5	1			12 hz	3	2			12 hz	0	1		12 hz	1	1
15 hz	1	1			15 hz	0	0			15 hz	0	0		15 hz	1	0
20 hz	0	0			20 hz	0	0			20 hz	0	0		20 hz	0	0
25 hz	0	1			25 hz	0	0			25 hz	1	0		25 hz	0	0
30 hz	10	0			30 hz	7	0			30 hz	5	0		30 hz	4	1

## Sheet: Fourier Amplitude Data
Mean Theta Amplitudes						Mean Alpha Amplitudes						Mean Beta Amplitudes
Age	H1	H2	H3	H4		Age	H1	H2	H3	H4		Age	H1	H2	H3	H4
15	19.44	19.88	10.96	12.35		15	22.5	15.74	14.22	13.51		15	17.1775	14.38	7.1625	6.576
15	21.66	19.77	13.78	13.71		17	X	12.71	11.93	7.184		15	20.9625	15.3725	11.357	6.72333
17	X	18.25	12.43	10.48		21	26.23	26.78	16.8	16.6		17	11.6893	6.532	4.4765	16.72
21	25.07	26.2	18.83	19.83		22	29.69	24.41	15.81	12.06		20	12.3492	7.79367	7.4425	12.75
22	26.13	29.58	11.29	15.44		28	28.73	28.87	12.74	10.01		21	18.87	17	14.58	X
28	25.06	30.37	10.53	13.67		20	26.23	26.78	16.8	16.6		22	18.035	10.0393	5.6765	5.3495
53	14.12	22.1	9.853	4.924		53	12.38	24.01	5.632	11.88		28	23.4825	7.20767	4.2725	2.632
60	X	15.88	6.444	6.672		49	16.1	13.19	8.282	8.389		49	6.70633	5.567	X	X
49	21.39	12.86	7.881	10.87		49	18.84	17.9	18.26	12.09		49	13.643	18.71	6.034	X
49	18.54	19.04	12.37	11.01		86	12.64	7.441	5.93567	2.782		53	8.961	6.58167	5.621	5.951
86	14.76	11	7.957	X		70	13.56	13.9167	7.70433	5.273		60	12.11	6.958	3.576	X
70	14.3	18.43	14.53	9.6		65	13.75	15.8767	8.44133	8.66867		65	9.54333	7.929	5.963	4.384
65	10.56	18.94	16.65	X		69	10.3827	6.02967	2.326	4.152		70	11.65	5.728	4.238	X
69	9.713	8.326	13.0457	X								69	5.9955	4.769	X	X
												86	6.87867	5.5975	2.484	X
